# Supplementary material for: Distinct Adverse Reactions to mRNA, Inactivated Virus, and Adenovirus Vector COVID-19 Vaccines: Insights from a Cohort Study on Atopic and Non-Atopic Subjects in Brazil
Source: MDPI journal article supplement (doi:10.3390/vaccines12040408), 2024-04-12
Supplement: s1 [file s1]

## Supplementary figures

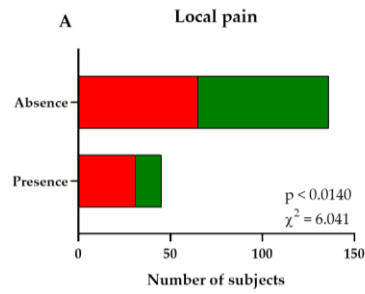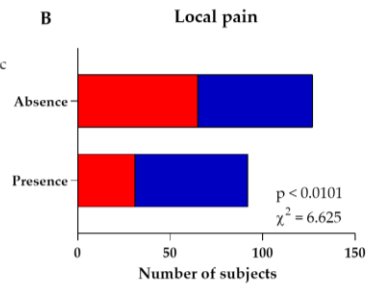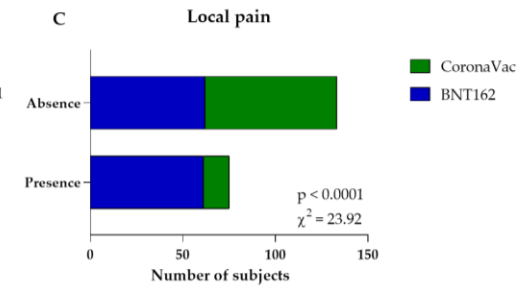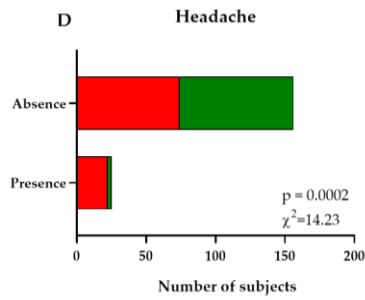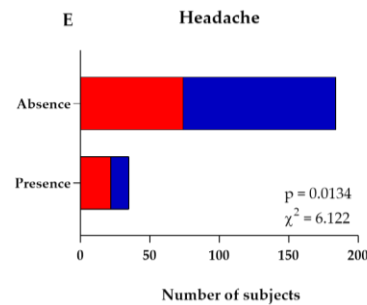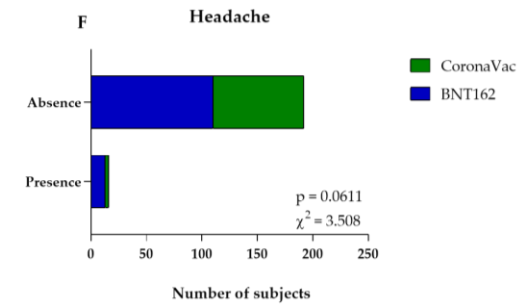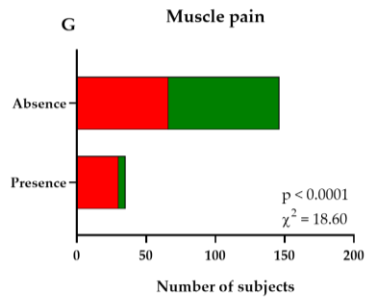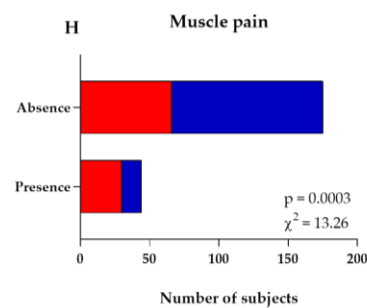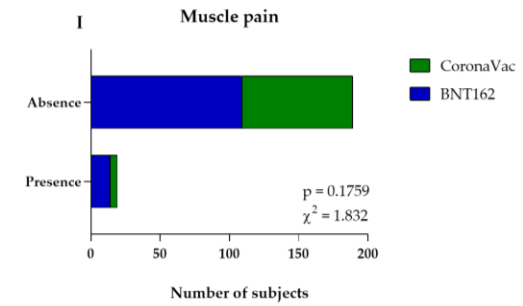

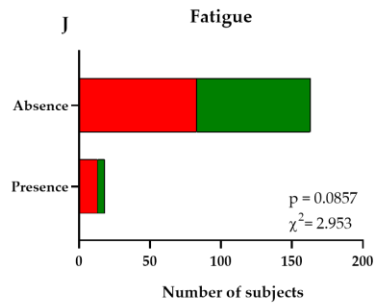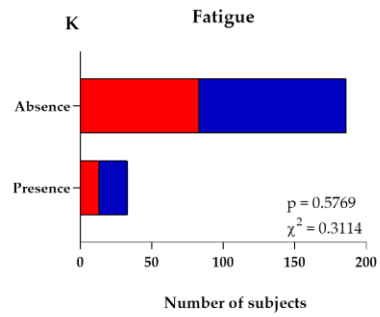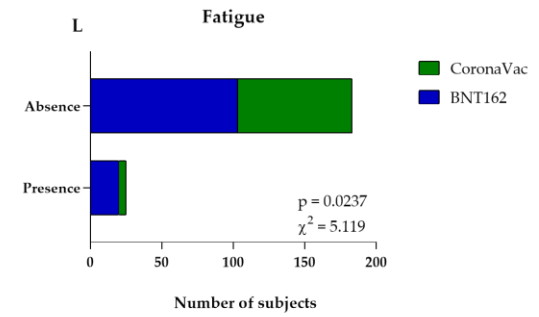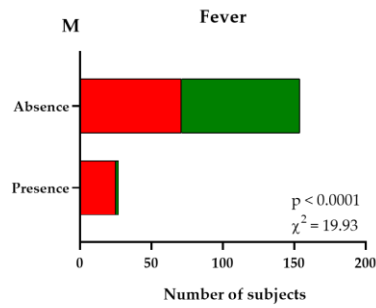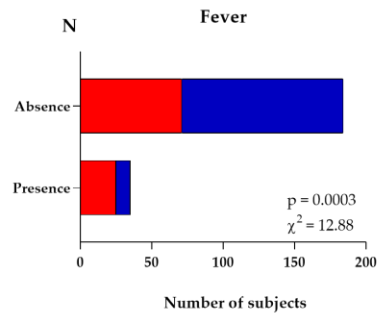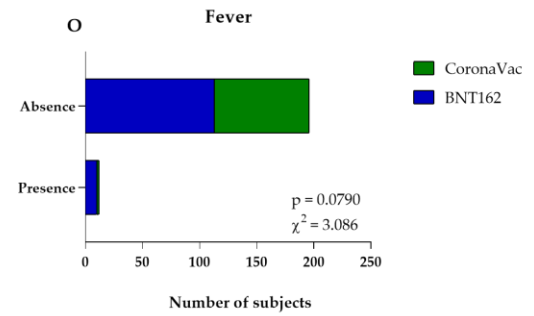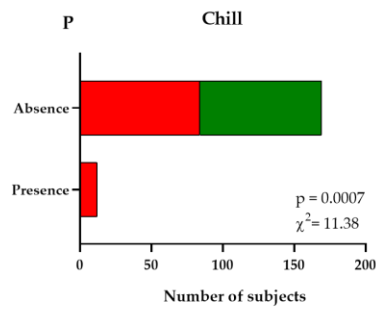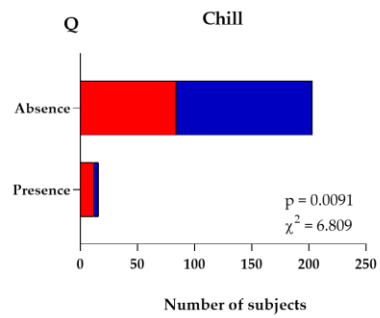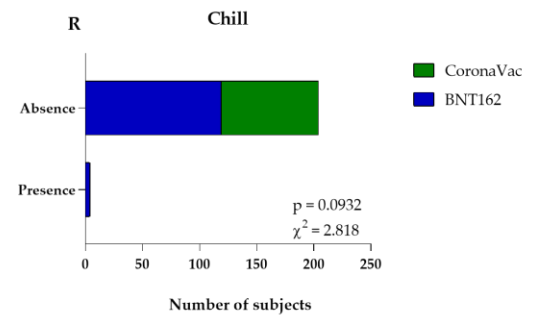

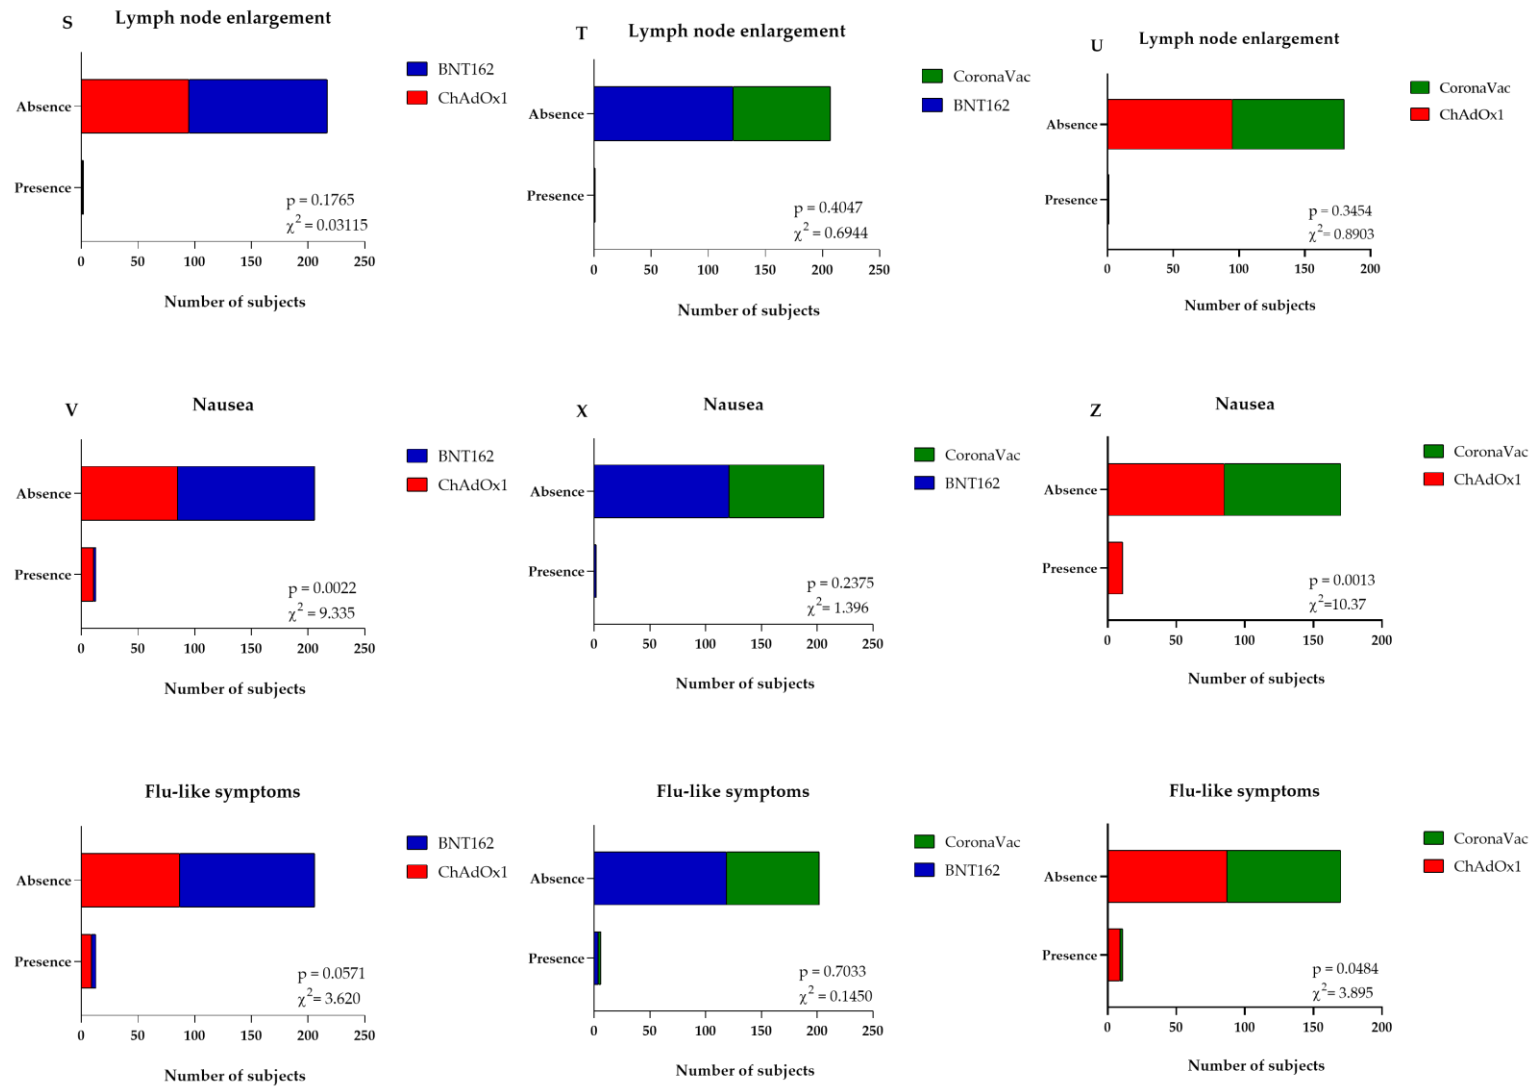

**Figure S1.** Comparison among BNT162, ChAdOx1, and CoronaVac COVID-19 vaccines regarding absence or presence of adverse effects reported by subjects.

### Supplementary tables

**Table S1.** Main adverse effects reported by atopic (n = 166) and non-atopic subjects (n = 139) in the first shot of BNT162, ChAdOx1, and CoronaVac vaccines.

| Adverse effect         | Atopic <sup>†</sup> | Non-atopic | p      |
|------------------------|---------------------|------------|--------|
| Local pain             | 62 (37.3%)          | 44 (31.9%) | 0.3347 |
| Headache               | 25 (15%)            | 13 (9.4%)  | 0.1641 |
| Muscle Pain            | 31 (18.7%)          | 18 (13.0%) | 0.2109 |
| Fatigue                | 22 (13.2%)          | 16 (11.6%) | 0.4769 |
| Fever                  | 23 (13.9%)          | 14 (10.1%) | 0.3796 |
| Chill                  | 11 (6.6%)           | 5 (3.6%)   | 0.3059 |
| Lymph node enlargement | 2 (1.2%)            | 0          | 0.5028 |
| Nausea                 | 9 (5.4%)            | 4 (2.9%)   | 0.3951 |
| Flu-like symptoms      | 10 (6.0%)           | 5 (3.6%)   | 0.4286 |

**Table S2.** Main adverse effects reported by atopic (n = 78) and non-atopic subjects (n = 45) in the first shot of BNT162 vaccine.

| Adverse effect         | Atopic     | Non-atopic | p       |
|------------------------|------------|------------|---------|
| Local pain             | 39 (50%)   | 22 (48.9%) | 0.9999  |
| Headache               | 10 (12.8%) | 3 (6.7%)   | 0.3703  |
| Muscle Pain            | 7 (8.9%)   | 7 (15.6%)  | 0.3769  |
| Fatigue                | 10 (12.8%) | 10 (22.2%) | 0.2079  |
| Fever                  | 3 (3.9%)   | 7 (15.6%)  | 0.0362* |
| Chill                  | 2 (2.6%)   | 2 (4.4%)   | 0.6229  |
| Lymph node enlargement | 1 (1.2%)   | 0          | 0.999   |
| Nausea                 | 1 (1.3%)   | 1 (2.2%)   | 0.999   |
| Flu-like symptoms      | 1 (1.3%)   | 3 (6.7%)   | 0.1383  |

**Table S3.** Main adverse effects reported by atopic (n = 44) and non-atopic subjects (n = 53) in the first shot of ChAdOx1 vaccine.

| <b>Adverse effect</b>  | <b>Atopic</b> | <b>Non-atopic</b> | <b>p</b> |
|------------------------|---------------|-------------------|----------|
| Local pain             | 14 (32.7%)    | 17 (32.1%)        | 0.9999   |
| Headache               | 14 (32.7%)    | 8 (15.1%)         | 0.0529   |
| Muscle Pain            | 20 (46.5%)    | 10 (18.8%)        | 0.0044*  |
| Fatigue                | 8 (18.6%)     | 5 (9.4%)          | 0.237    |
| Fever                  | 19 (44.2%)    | 6 (11.3%)         | 0.0004*  |
| Chill                  | 9 (20.9%)     | 3 (5.7%)          | 0.0316*  |
| Lymph node enlargement | 1             | 0                 | 0.4479   |
| Nausea                 | 8 (18.6%)     | 3 (5.7%)          | 0.0589   |
| Flu-like symptoms      | 7 (16.9%)     | 2 (3.8%)          | 0.0734   |

**Table S4.** Main adverse effects reported by atopic (n = 45) and non-atopic subjects (n = 40) in the first shot of CoronaVac vaccine.

| <b>Adverse effect</b>  | <b>Atopic</b> | <b>Non-atopic</b> | <b>p</b> |
|------------------------|---------------|-------------------|----------|
| Local pain             | 9 (20%)       | 5 (12.5%)         | 0.3947   |
| Headache               | 1 (2.2%)      | 2 (5%)            | 0.5991   |
| Muscle Pain            | 4 (8.9%)      | 1 (2.5%)          | 0.3644   |
| Fatigue                | 4 (8.9%)      | 1 (2.5%)          | 0.3644   |
| Fever                  | 1 (2.2%)      | 1 (2.5%)          | 0.9999   |
| Chill                  | 0             | 0                 | 0.9999   |
| Lymph node enlargement | 0             | 0                 | 0.999    |
| Nausea                 | 0             | 0                 | 0.9999   |
| Flu-like symptoms      | 2 (4.4%)      | 0                 | 0.4958   |
